# Supplementary figures and images for: Investigating Cumulative Exposures among 3- to 4-Year-Old Children Using Wearable Ultrafine Particle Sensors and Language Environment Devices: A Pilot and Feasibility Study
Source: MDPI journal article supplement (doi:10.3390/ijerph17145259), 2020-07-21

# WHAT ARE WE DOING TODAY?

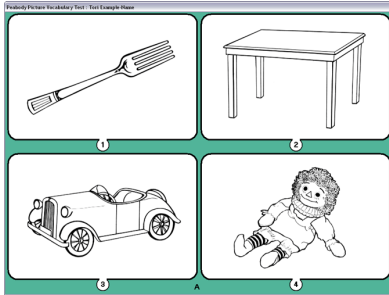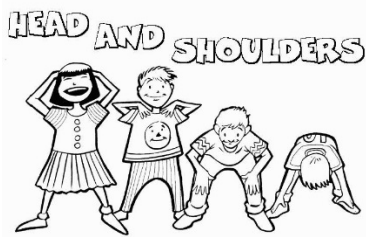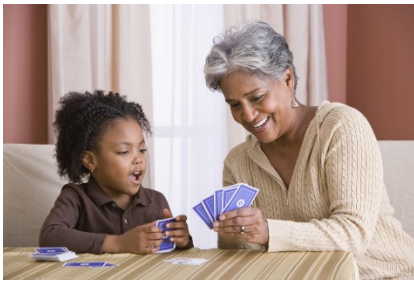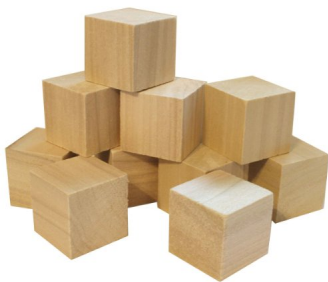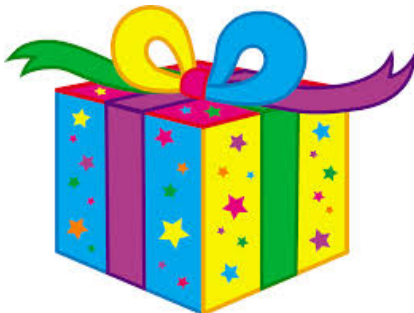

Supplement: s1 [file s1]
